# Supplementary material for: Immune-Modulatory Effects upon Oral Application of Cumin-Essential-Oil to Mice Suffering from Acute Campylobacteriosis
Source: MDPI journal article supplement (doi:10.3390/pathogens10070818), 2021-06-29
Supplement: s1 [file s1]

**Supplementary Table S1:** Antibiotic cocktail.

| Antibiotic                | Concentration | Company                                                 |
|---------------------------|---------------|---------------------------------------------------------|
| Ampicillin plus Sulbactam | 1 g/L         | Dr. Friedrich Eberth Arzneimittel, Ursensollen, Germany |
| Vancomycin                | 500 mg/L      | Hikma Pharmaceuticals, London, UK                       |
| Ciprofloxacin             | 200 mg/L      | Fresenius Kabi, Bad Homburg, Germany                    |
| Imipenem                  | 250 mg/L      | Fresenius Kabi                                          |
| Metronidazole             | 1 g/L         | B. Braun, Melsungen, Germany                            |

**Supplementary Table S2:** Clinical scores (maximum 12 points).

| Clinical aspect   | Scores                                                                                                                                              |
|-------------------|-----------------------------------------------------------------------------------------------------------------------------------------------------|
| Wasting symptoms  | 0: normal<br>1: ruffled fur<br>2: less locomotion<br>3: isolation<br>4: severely compromised locomotion, pre-final aspect                           |
| Stool consistency | 0: formed feces<br>2: pasty feces<br>4: liquid feces                                                                                                |
| Fecal blood       | 0: no blood<br>2: microscopic detection of blood by the Guajac method using Haemocult, Beckman Coulter/PCD, Germany<br>4: macroscopic blood visible |

**Supplementary Table S3:** Histopathological scores (maximum 4 points).

|         |                                                                                                                                             |
|---------|---------------------------------------------------------------------------------------------------------------------------------------------|
| Score 1 | Minimal inflammatory cell infiltrates in the mucosa with intact epithelium                                                                  |
| Score 2 | Mild inflammatory cell infiltrates in the mucosa and submucosa with mild hyperplasia and mild goblet cell loss                              |
| Score 3 | Moderate inflammatory cell infiltrates in the mucosa with moderate goblet cell loss                                                         |
| Score 4 | Marked inflammatory cell infiltration into the mucosa and submucosa with marked goblet cell loss, multiple crypt abscesses, and crypt loss. |

**Supplementary Table S4:** *In situ* immunohistochemistry (colonic paraffin sections; 5 µm).

| Detection                  | Primary Antibodies | Dilution | Company                                                 |
|----------------------------|--------------------|----------|---------------------------------------------------------|
| Apoptotic epithelial cells | cleaved caspase-3  | 1:200    | Asp175, Cell Signaling, Beverly, MA, USA,               |
| Macrophages/ Monocytes     | F4/80              | 1:50     | no. 14-4801, clone BM8, eBioscience, San Diego, CA, USA |
| T lymphocytes              | CD3                | 1:10     | no. N1580, Dako                                         |
| Regulatory T cells         | FOXP3              | 1:100    | clone FJK-165, no. 14-5773, eBioscience                 |
| B lymphocytes              | B220               | 1:200    | no. 14-0452-81, eBioscience                             |
