# Supplementary material for: Immune-Modulatory Effects upon Oral Application of Cumin-Essential-Oil to Mice Suffering from Acute Campylobacteriosis
Source: MDPI journal article supplement (doi:10.3390/pathogens10070818), 2021-06-29
Supplement: s1 [file s1]

# **A**      **Histopathology - COLON**

**Naive**

**Placebo**

**Cumin-EO**

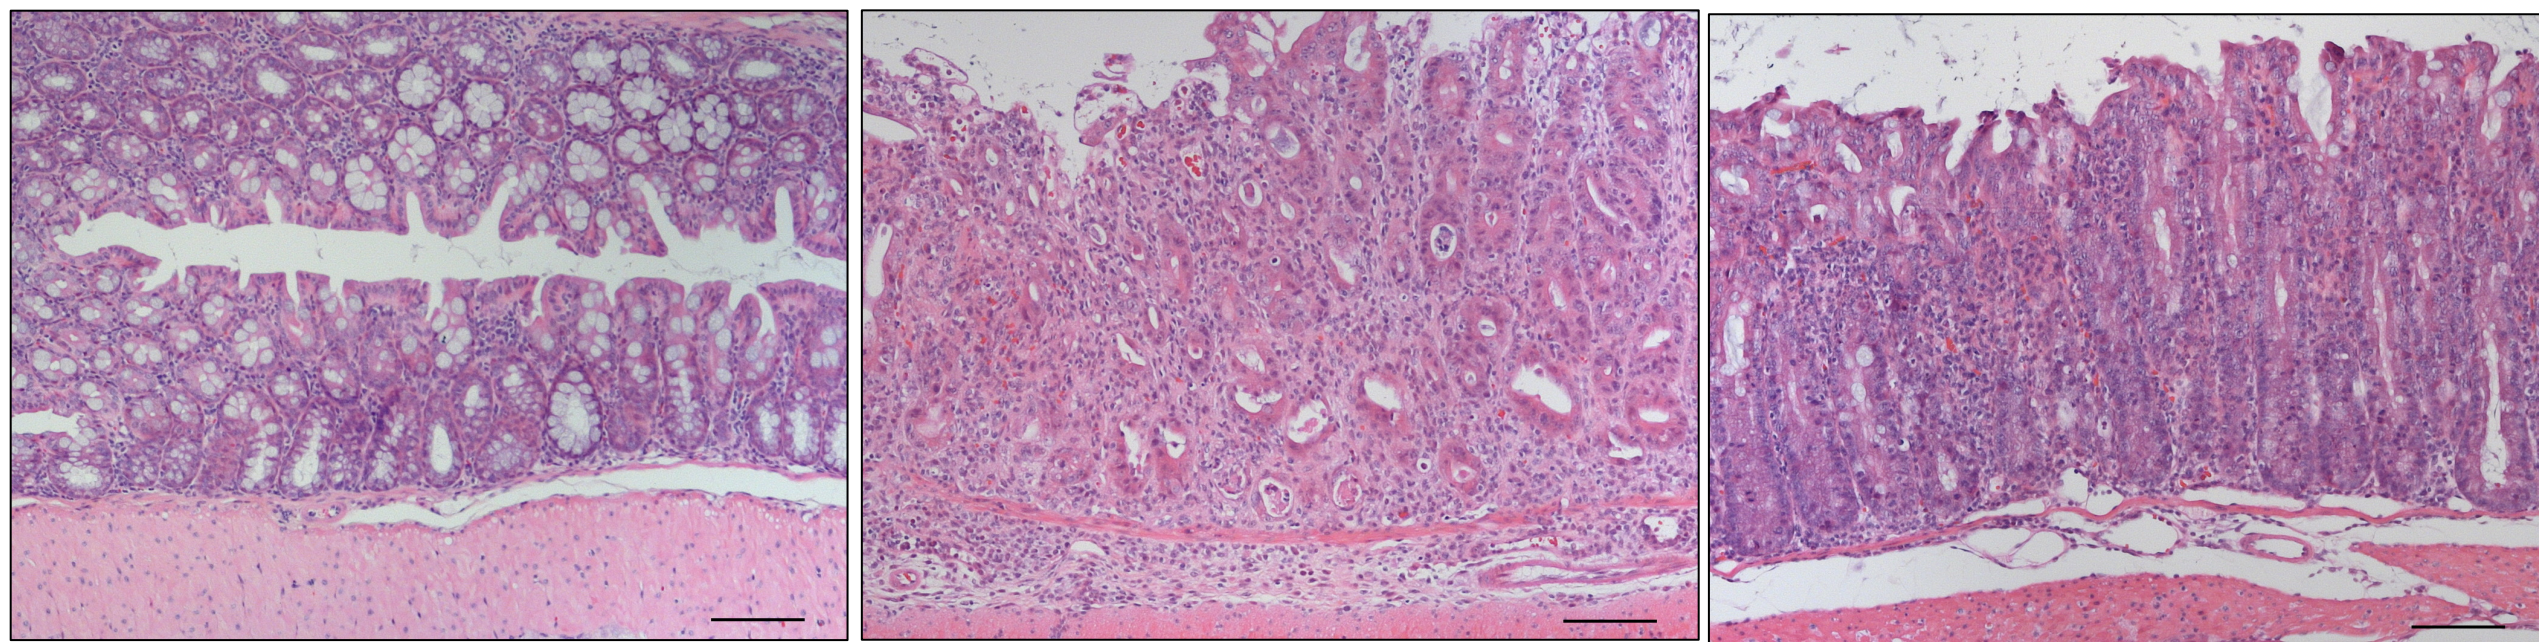

**(100 x magnification, scale bar 100  $\mu$ m)**



# **B**      **Apoptotic Cells - COLON**

**Naive**

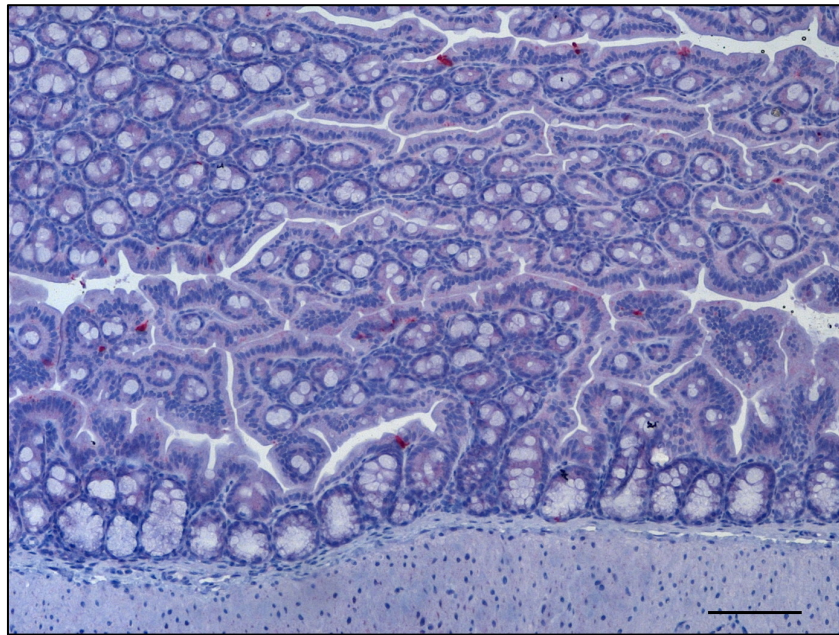

**Placebo**

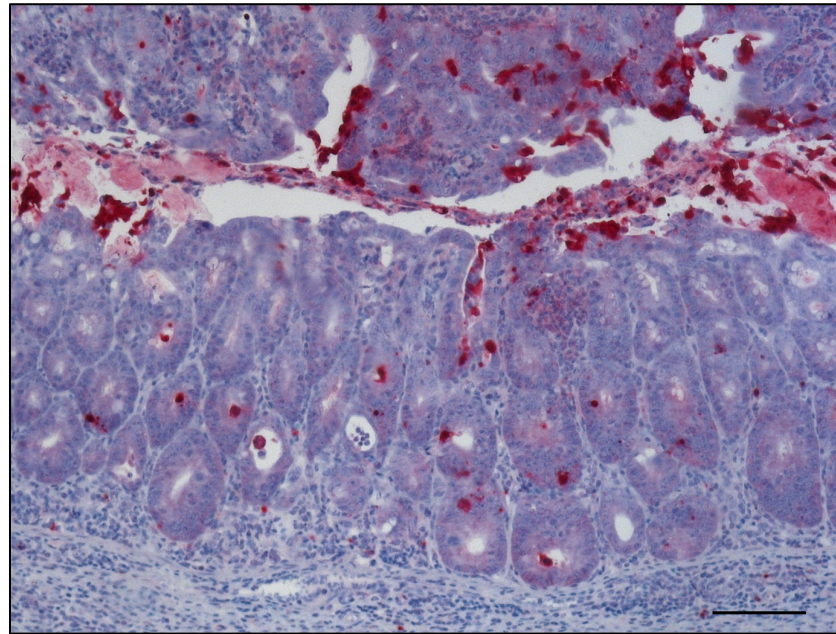

**Cumin-EO**

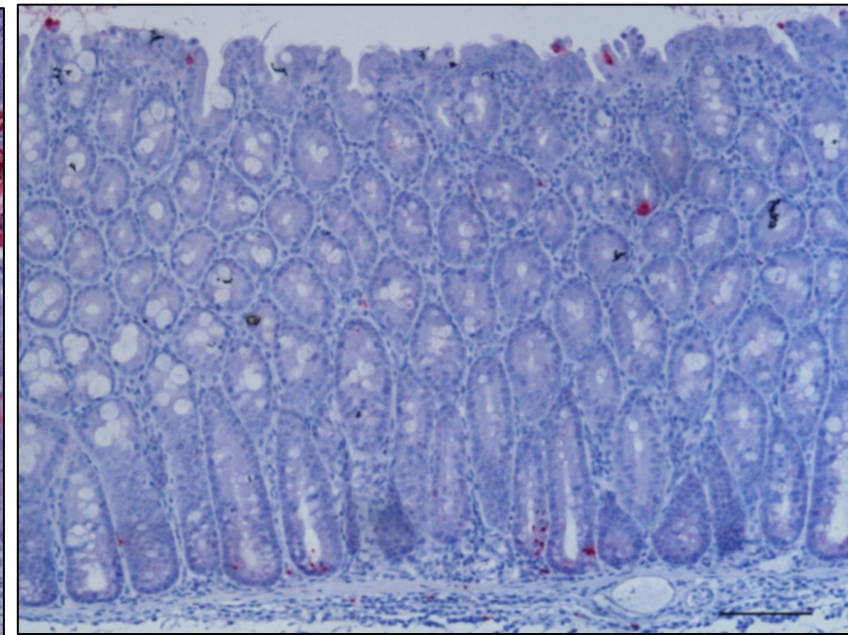

**(100 x magnification, scale bar 100  $\mu$ m)**
